# Supplementary material
Source: HighWire-hosted journal article supplement (https://bmjopen.bmj.com/content/6/7/e011945)

## Appendix 2: Scoping Review Search Strategy

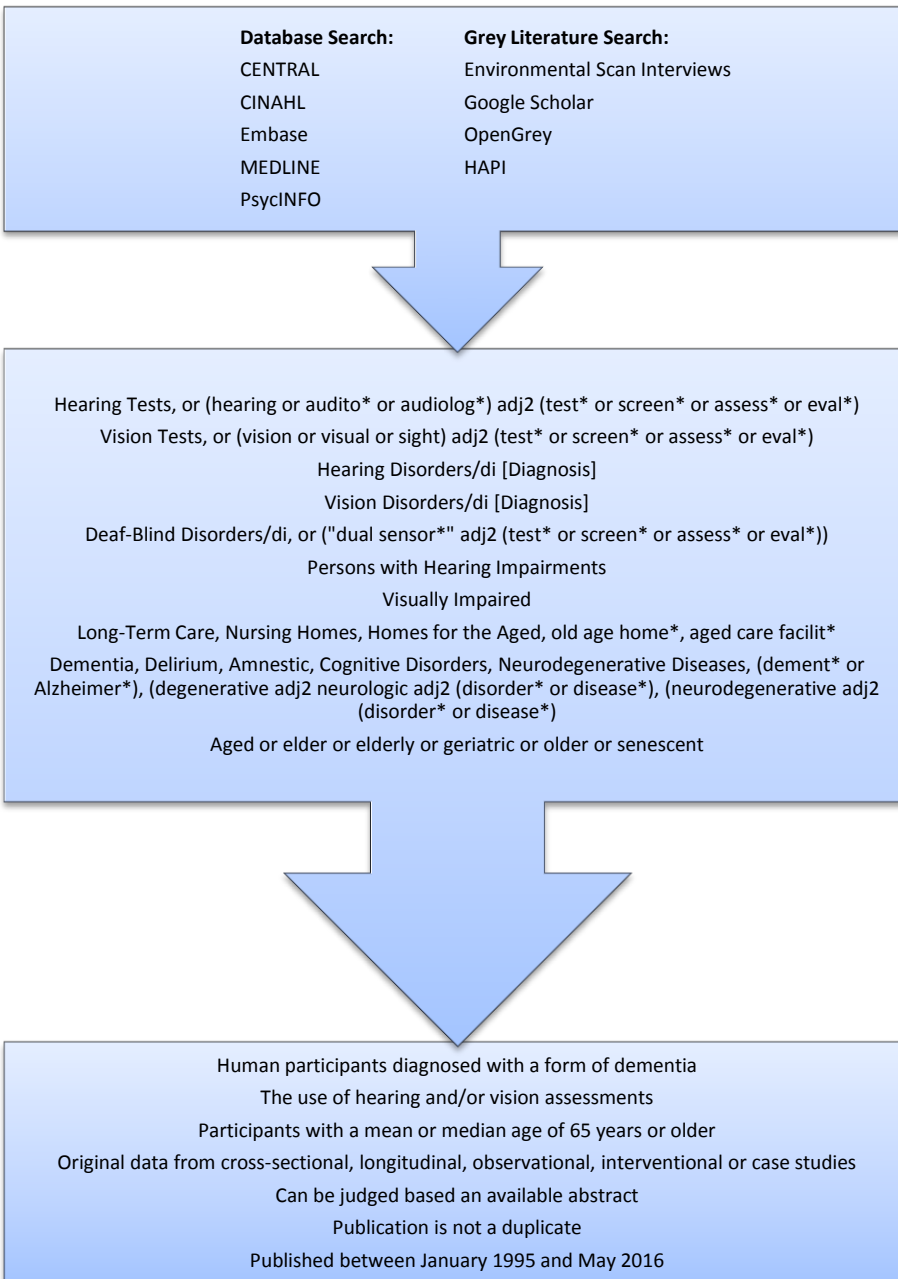

Supplement: inline-supplementary-material-2 [file inline-supplementary-material-2.pdf]

### Appendix 3: Development of the sensory screening package – Phase 1

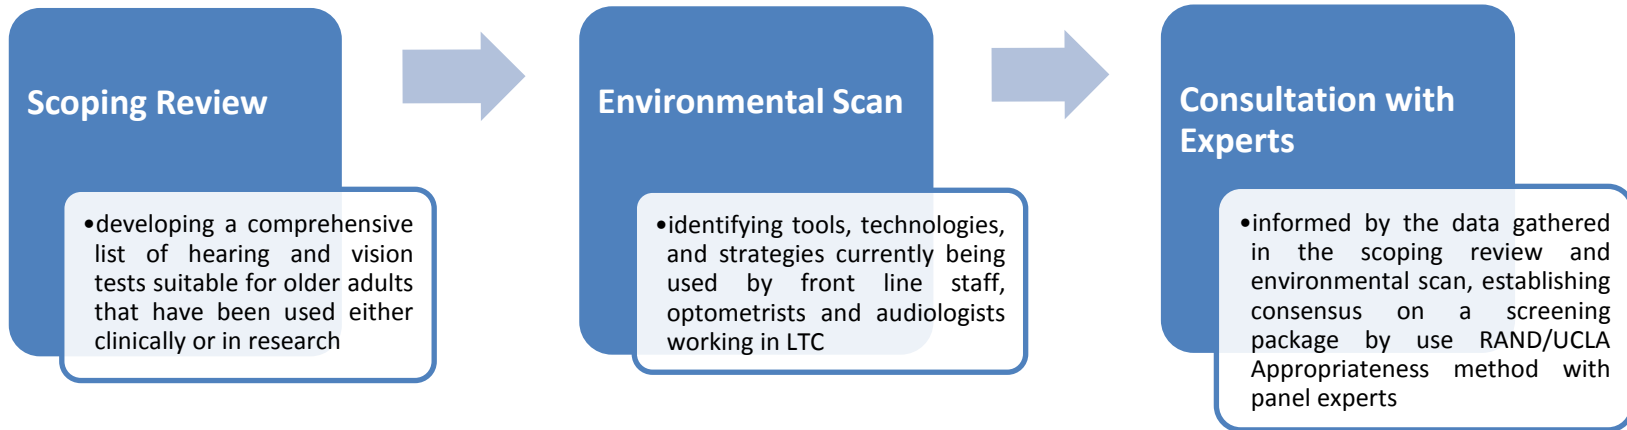

Supplement: inline-supplementary-material-3 [file inline-supplementary-material-3.pdf]
